# Supplementary material
Source: PubMed Central journal article supplement (PMC3940161)
Supplement: NIHMS553770-supplement-Supplementary_Information.pdf [file NIHMS553770-supplement-Supplementary_Information.pdf]

Supplementary information S1 (table). Sources of molecular interaction and ‘omics’ profiling data

|                         | Interaction type(s)                                         | Detection methodologies                                                                                                                                                                             | Databases                                                                                                                                                                                                                                                                           |
|-------------------------|-------------------------------------------------------------|-----------------------------------------------------------------------------------------------------------------------------------------------------------------------------------------------------|-------------------------------------------------------------------------------------------------------------------------------------------------------------------------------------------------------------------------------------------------------------------------------------|
| <b>Physical</b>         | Protein-protein                                             | Yeast-2-hybrid (Y2H) <sup>1-3</sup> , co-immuno-precipitation (Co-IP) <sup>4</sup> , mass spectroscopy <sup>5,6</sup> , affinity purification coupled with mass spectroscopy (AP/MS) <sup>7,8</sup> | BioGRID <sup>9</sup> , IntAct <sup>10</sup> , APID <sup>11</sup> , STRING <sup>12</sup> , MINT <sup>13</sup> , DIP <sup>14</sup> , HPRD <sup>15</sup> , MIPS-MPPI <sup>16</sup> , Netpath <sup>17</sup> , DroiD <sup>18</sup>                                                       |
|                         | Protein-DNA (e.g., regulatory networks)                     | Yeast-1-hybrid (Y1H) <sup>19</sup> , chromatin immuno-precipitation based methods (CHIP-CHIP) <sup>20</sup> , DNA-footprinting <sup>21</sup>                                                        | TRANSFAC <sup>22</sup> , UniProbe <sup>23</sup> , DroiD <sup>18</sup> , BioGRID <sup>9</sup> , TcoF-DB <sup>24</sup> , BIPA <sup>25</sup> , hPDI <sup>26</sup> , EDGEDb <sup>27</sup> , NPIDB <sup>28,29</sup>                                                                      |
|                         | Protein-RNA                                                 | RNA electro-mobility shift (RNA-EMSA) <sup>30</sup> , RNA-pull down <sup>31</sup>                                                                                                                   | PRID <sup>32</sup> , BIPA <sup>25</sup> NPInter <sup>33</sup> , RBPDB <sup>34</sup> , PRIDB <sup>35</sup> , StarBase <sup>36</sup>                                                                                                                                                  |
|                         | Metabolic (e.g., enzyme-substrate, ligand-receptor)         | Mass spectroscopy based selective reaction monitoring (SRM) <sup>6,37</sup> , NMR <sup>38</sup> , affinity purification <sup>8</sup> , co-IP <sup>3</sup> , fluorescence spectroscopy <sup>39</sup> | Reactome <sup>40</sup> , KEGG <sup>41</sup> , BioCyc and MetaCyc <sup>42</sup> , HMDB <sup>43,44</sup> , EcoCyc <sup>45</sup> , HumanCyc <sup>46</sup> , ConsensusPathDB <sup>47</sup>                                                                                              |
|                         | Protein/gene-compound (e.g., drug-target, chemical-protein) | Chemical structure <sup>48,49</sup> , forward or reverse chemo-genomic/proteomic profiling <sup>50-52</sup> , in silico predictions <sup>53</sup>                                                   | SuperTarget <sup>54</sup> , Matador <sup>54</sup> , DrugBank <sup>55</sup> , ChemProt <sup>56</sup> , STITCH <sup>57</sup> , AffinDB <sup>58</sup> , MatrixDB <sup>59</sup> , PSMDB <sup>60</sup> , PDB-Ligand <sup>61</sup> , ChEMBL <sup>62</sup> , ConsensusPathDB <sup>47</sup> |
| <b>Functional</b>       | Genetic (gene-gene)                                         | Synthetic genetic array (SGA) <sup>63</sup> , Epistatic Miniarray Profiling (E-MAP) <sup>64</sup> , co-expression profiling <sup>65,66</sup>                                                        | BioGRID <sup>9</sup> , DRYGIN <sup>67</sup> , CYGD <sup>68</sup> , DroiD <sup>18</sup> , ConsensusPathDB <sup>47</sup>                                                                                                                                                              |
|                         | Gene-Disease                                                | Literature curation, clinical and sequence information                                                                                                                                              | OMIM <sup>69</sup> , HuDiNe <sup>70</sup> , Diseaseome <sup>71</sup>                                                                                                                                                                                                                |
| <b>Omics data type</b>  |                                                             | <b>Detection methodologies</b>                                                                                                                                                                      | <b>Databases</b>                                                                                                                                                                                                                                                                    |
| Transcriptomics         |                                                             | Microarray <sup>72</sup> , RNASeq <sup>73</sup>                                                                                                                                                     | GEO <sup>74</sup> , SMD <sup>75</sup> , TCGA <sup>76</sup> , GXD <sup>77</sup> , ONCOMINE <sup>78</sup> , ArrayExpress <sup>79</sup> ,                                                                                                                                              |
| RNAi (phenomics)        |                                                             | RNAi interference assay <sup>80</sup>                                                                                                                                                               | RNAiDB <sup>81</sup> , GenomeRNAi <sup>82</sup> , siRecords <sup>83</sup>                                                                                                                                                                                                           |
| Epigenomics             |                                                             | Methylation profiling <sup>84</sup>                                                                                                                                                                 | DAnCER <sup>85</sup> , DiseaseMeth <sup>86</sup> , PubMeth <sup>87</sup> , MethDB <sup>88</sup> , MethCancerDB <sup>89</sup> , MethCancer <sup>90</sup>                                                                                                                             |
| Mutation / SNP          |                                                             | SNP Array <sup>91</sup> , genome sequencing <sup>92</sup>                                                                                                                                           | TCGA <sup>76</sup> , dbSNP <sup>93</sup> , dbQSNP <sup>94</sup> , GWAS Central <sup>95</sup> , OMIM <sup>69</sup>                                                                                                                                                                   |
| Proteomics              |                                                             | CHIP <sup>11,2,96</sup> , Mass Spectrometry <sup>5,6</sup>                                                                                                                                          | PDB <sup>97</sup> , ExPASy <sup>98</sup> , InterPro <sup>99</sup> , World-2DPage <sup>100</sup> , JASPAR <sup>101</sup>                                                                                                                                                             |
| Phosphorylation profile |                                                             | Mass Spectrometry <sup>5</sup> , literature curation                                                                                                                                                | PhosphoGRID <sup>102</sup> , PhosphoELM <sup>103</sup> , PHOSIDA <sup>104</sup>                                                                                                                                                                                                     |

For more information and databases, visit [www.pathguide.org](http://www.pathguide.org)

**References**

- Fields, S. High-throughput two-hybrid analysis. The promise and the peril. *FEBS J* **272**, 5391-9 (2005).
- Ito, T. et al. A comprehensive two-hybrid analysis to explore the yeast protein interactome. *Proc Natl Acad Sci U S A* **98**, 4569-74 (2001).
- Pandey, A. & Mann, M. Proteomics to study genes and genomes. *Nature* **405**, 837-46 (2000).
- Phizicky, E.M. & Fields, S. Protein-protein interactions: methods for detection and analysis. *Microbiol Rev* **59**, 94-123 (1995).
- Ho, Y. et al. Systematic identification of protein complexes in *Saccharomyces cerevisiae* by mass spectrometry. *Nature* **415**, 180-3 (2002).
- Aebersold, R. & Mann, M. Mass spectrometry-based proteomics. *Nature* **422**, 198-207 (2003).
- Collins, M.O. & Choudhary, J.S. Mapping multiprotein complexes by affinity purification and mass spectrometry. *Curr Opin Biotechnol* **19**, 324-30 (2008).
- Rigaut, G. et al. A generic protein purification method for protein complex characterization and proteome exploration. *Nat Biotechnol* **17**, 1030-2 (1999).
- Stark, C. et al. BioGRID: a general repository for interaction datasets. *Nucleic Acids Res* **34**, D535-9 (2006).
- Kerrien, S. et al. The IntAct molecular interaction database in 2012. *Nucleic Acids Res* **40**, D841-6 (2012).
- Prieto, C. & De Las Rivas, J. APID: Agile Protein Interaction DataAnalyzer. *Nucleic Acids Res* **34**, W298-302 (2006).
- Szklarczyk, D. et al. The STRING database in 2011: functional interaction networks of proteins, globally integrated and scored. *Nucleic Acids Res* **39**, D561-8 (2011).
- Chatr-aryamontri, A. et al. MINT: the Molecular INteraction database. *Nucleic Acids Res* **35**, D572-4 (2007).
- Salwinski, L. et al. The Database of Interacting Proteins: 2004 update. *Nucleic Acids Res* **32**, D449-51 (2004).
- Keshava Prasad, T.S. et al. Human Protein Reference Database--2009 update. *Nucleic Acids Res* **37**, D767-72 (2009).

16. Pagel, P. et al. The MIPS mammalian protein-protein interaction database. *Bioinformatics* **21**, 832-4 (2005).
17. Kandasamy, K. et al. NetPath: a public resource of curated signal transduction pathways. *Genome Biol* **11**, R3 (2010).
18. Yu, J., Pacifico, S., Liu, G. & Finley, R.L., Jr. DroID: the Drosophila Interactions Database, a comprehensive resource for annotated gene and protein interactions. *BMC Genomics* **9**, 461 (2008).
19. Reece-Hoyes, J.S. et al. Yeast one-hybrid assays for gene-centered human gene regulatory network mapping. *Nat Methods* **8**, 1050-2 (2011).
20. Mockler, T.C. et al. Applications of DNA tiling arrays for whole-genome analysis. *Genomics* **85**, 1-15 (2005).
21. Hampshire, A.J., Rusling, D.A., Broughton-Head, V.J. & Fox, K.R. Footprinting: a method for determining the sequence selectivity, affinity and kinetics of DNA-binding ligands. *Methods* **42**, 128-40 (2007).
22. Matys, V. et al. TRANSFAC: transcriptional regulation, from patterns to profiles. *Nucleic Acids Res* **31**, 374-8 (2003).
23. Newburger, D.E. & Bulyk, M.L. UniPROBE: an online database of protein binding microarray data on protein-DNA interactions. *Nucleic Acids Res* **37**, D77-82 (2009).
24. Schaefer, U., Schmeier, S. & Bajic, V.B. TcoF-DB: dragon database for human transcription co-factors and transcription factor interacting proteins. *Nucleic Acids Res* **39**, D106-10 (2011).
25. Lee, S. & Blundell, T.L. BIPA: a database for protein-nucleic acid interaction in 3D structures. *Bioinformatics* **25**, 1559-60 (2009).
26. Xie, Z., Hu, S., Blackshaw, S., Zhu, H. & Qian, J. hPDI: a database of experimental human protein-DNA interactions. *Bioinformatics* **26**, 287-9 (2010).
27. Barrasa, M.I., Vaglio, P., Cavasino, F., Jacotot, L. & Walhout, A.J. EDGEDb: a transcription factor-DNA interaction database for the analysis of *C. elegans* differential gene expression. *BMC Genomics* **8**, 21 (2007).
28. Kirsanov, D.D. et al. NPIDB: Nucleic acid-Protein Interaction DataBase. *Nucleic Acids Res* **41**, D517-23 (2013).
29. Spirin, S., Titov, M., Karyagina, A. & Alexeevski, A. NPIDB: a database of nucleic acids-protein interactions. *Bioinformatics* **23**, 3247-8 (2007).
30. Smith, A.J. & Humphries, S.E. Characterization of DNA-binding proteins using multiplexed competitor EMSA. *J Mol Biol* **385**, 714-7 (2009).
31. Keene, J.D., Komisarow, J.M. & Friedersdorf, M.B. RIP-Chip: the isolation and identification of mRNAs, microRNAs and protein components of ribonucleoprotein complexes from cell extracts. *Nat Protoc* **1**, 302-7 (2006).
32. Morozova, N., Allers, J., Myers, J. & Shamoo, Y. Protein-RNA interactions: exploring binding patterns with a three-dimensional superposition analysis of high resolution structures. *Bioinformatics* **22**, 2746-52 (2006).
33. Wu, T. et al. NPInter: the noncoding RNAs and protein related biomacromolecules interaction database. *Nucleic Acids Res* **34**, D150-2 (2006).
34. Cook, K.B., Kazan, H., Zuberi, K., Morris, Q. & Hughes, T.R. RBPDB: a database of RNA-binding specificities. *Nucleic Acids Res* **39**, D301-8 (2011).
35. Lewis, B.A. et al. PRIDB: a Protein-RNA Interface Database. *Nucleic Acids Res* **39**, D277-82 (2011).
36. Yang, J.H. et al. starBase: a database for exploring microRNA-mRNA interaction maps from Argonaute CLIP-Seq and Degradome-Seq data. *Nucleic Acids Res* **39**, D202-9 (2011).
37. Picotti, P. & Aebersold, R. Selected reaction monitoring-based proteomics: workflows, potential, pitfalls and future directions. *Nat Methods* **9**, 555-66 (2012).
38. Blaise, B.J. et al. Metabotyping of *Caenorhabditis elegans* reveals latent phenotypes. *Proc Natl Acad Sci U S A* **104**, 19808-12 (2007).
39. Huang, T. et al. Analysis and prediction of the metabolic stability of proteins based on their sequential features, subcellular locations and interaction networks. *PLoS One* **5**, e10972 (2010).
40. Vastrik, I. et al. Reactome: a knowledge base of biologic pathways and processes. *Genome Biol* **8**, R39 (2007).
41. Kanehisa, M., Goto, S., Kawashima, S., Okuno, Y. & Hattori, M. The KEGG resource for deciphering the genome. *Nucleic Acids Res* **32**, D277-80 (2004).
42. Caspi, R. et al. MetaCyc: a multiorganism database of metabolic pathways and enzymes. *Nucleic Acids Res* **34**, D511-6 (2006).
43. Wishart, D.S. et al. HMDB: the Human Metabolome Database. *Nucleic Acids Res* **35**, D521-6 (2007).
44. Wishart, D.S. et al. HMDB: a knowledgebase for the human metabolome. *Nucleic Acids Res* **37**, D603-10 (2009).
45. Keseler, I.M. et al. EcoCyc: a comprehensive database of *Escherichia coli* biology. *Nucleic Acids Res* **39**, D583-90 (2011).
46. Romero, P. et al. Computational prediction of human metabolic pathways from the complete human genome. *Genome Biol* **6**, R2 (2005).
47. Kamburov, A. et al. ConsensusPathDB: toward a more complete picture of cell biology. *Nucleic Acids Res* **39**, D712-7 (2011).
48. Bender, A. et al. Analysis of pharmacology data and the prediction of adverse drug reactions and off-target effects from chemical structure. *ChemMedChem* **2**, 861-73 (2007).
49. Mizutani, S., Pauwels, E., Stoven, V., Goto, S. & Yamanishi, Y. Relating drug-protein interaction network with drug side effects. *Bioinformatics* **28**, i522-i528 (2012).
50. Hillenmeyer, M.E. et al. The chemical genomic portrait of yeast: uncovering a phenotype for all genes. *Science* **320**, 362-5 (2008).
51. Bredel, M. & Jacoby, E. Chemogenomics: an emerging strategy for rapid target and drug discovery. *Nat Rev Genet* **5**, 262-75 (2004).
52. Fliri, A.F., Loging, W.T., Thadeio, P.F. & Volkmann, R.A. Analysis of drug-induced effect patterns to link structure and side effects of medicines. *Nat Chem Biol* **1**, 389-97 (2005).
53. Yamanishi, Y., Kotera, M., Kanehisa, M. & Goto, S. Drug-target interaction prediction from chemical, genomic and pharmacological data in an integrated framework. *Bioinformatics* **26**, i246-54 (2010).
54. Gunther, S. et al. SuperTarget and Matador: resources for exploring drug-target relationships. *Nucleic Acids Res* **36**, D919-22 (2008).

55. Knox, C. *et al.* DrugBank 3.0: a comprehensive resource for 'omics' research on drugs. *Nucleic Acids Res* **39**, D1035-41 (2011).
56. Taboureau, O. *et al.* ChemProt: a disease chemical biology database. *Nucleic Acids Res* **39**, D367-72 (2011).
57. Kuhn, M., von Mering, C., Campillos, M., Jensen, L.J. & Bork, P. STITCH: interaction networks of chemicals and proteins. *Nucleic Acids Res* **36**, D684-8 (2008).
58. Block, P., Sotriffer, C.A., Dramburg, I. & Klebe, G. AffinDB: a freely accessible database of affinities for protein-ligand complexes from the PDB. *Nucleic Acids Res* **34**, D522-6 (2006).
59. Chautard, E., Ballut, L., Thierry-Mieg, N. & Ricard-Blum, S. MatrixDB, a database focused on extracellular protein-protein and protein-carbohydrate interactions. *Bioinformatics* **25**, 690-1 (2009).
60. Wallach, I. & Lilien, R. The protein-small-molecule database, a non-redundant structural resource for the analysis of protein-ligand binding. *Bioinformatics* **25**, 615-20 (2009).
61. Shin, J.M. & Cho, D.H. PDB-Ligand: a ligand database based on PDB for the automated and customized classification of ligand-binding structures. *Nucleic Acids Res* **33**, D238-41 (2005).
62. Gaulton, A. *et al.* ChEMBL: a large-scale bioactivity database for drug discovery. *Nucleic Acids Res* **40**, D1100-7 (2012).
63. Baryshnikova, A. *et al.* Quantitative analysis of fitness and genetic interactions in yeast on a genome scale. *Nat Methods* **7**, 1017-24 (2010).
64. Collins, S.R., Roguev, A. & Krogan, N.J. Quantitative genetic interaction mapping using the E-MAP approach. *Methods Enzymol* **470**, 205-31 (2010).
65. Stuart, J.M., Segal, E., Koller, D. & Kim, S.K. A gene-coexpression network for global discovery of conserved genetic modules. *Science* **302**, 249-55 (2003).
66. Vaske, C.J. *et al.* Inference of patient-specific pathway activities from multi-dimensional cancer genomics data using PARADIGM. *Bioinformatics* **26**, i237-45 (2010).
67. Koh, J.L. *et al.* DRYGIN: a database of quantitative genetic interaction networks in yeast. *Nucleic Acids Res* **38**, D502-7 (2010).
68. Guldener, U. *et al.* CYGD: the Comprehensive Yeast Genome Database. *Nucleic Acids Res* **33**, D364-8 (2005).
69. Hamosh, A., Scott, A.F., Amberger, J.S., Bocchini, C.A. & McKusick, V.A. Online Mendelian Inheritance in Man (OMIM), a knowledgebase of human genes and genetic disorders. *Nucleic Acids Res* **33**, D514-7 (2005).
70. Hidalgo, C.A., Blumm, N., Barabasi, A.L. & Christakis, N.A. A dynamic network approach for the study of human phenotypes. *PLoS Comput Biol* **5**, e1000353 (2009).
71. Goh, K.I. *et al.* The human disease network. *Proc Natl Acad Sci U S A* **104**, 8685-90 (2007).
72. Augenlicht, L.H. *et al.* Expression of cloned sequences in biopsies of human colonic tissue and in colonic carcinoma cells induced to differentiate in vitro. *Cancer Res* **47**, 6017-21 (1987).
73. Morin, R. *et al.* Profiling the HeLa S3 transcriptome using randomly primed cDNA and massively parallel short-read sequencing. *Biotechniques* **45**, 81-94 (2008).
74. Barrett, T. *et al.* NCBI GEO: archive for functional genomics data sets--10 years on. *Nucleic Acids Res* **39**, D1005-10 (2011).
75. Hubble, J. *et al.* Implementation of GenePattern within the Stanford Microarray Database. *Nucleic Acids Res* **37**, D898-901 (2009).
76. Cerami, E. *et al.* The cBio cancer genomics portal: an open platform for exploring multidimensional cancer genomics data. *Cancer Discov* **2**, 401-4 (2012).
77. Finger, J.H. *et al.* The mouse Gene Expression Database (GXD): 2011 update. *Nucleic Acids Res* **39**, D835-41 (2011).
78. Rhodes, D.R. *et al.* ONCOMINE: a cancer microarray database and integrated data-mining platform. *Neoplasia* **6**, 1-6 (2004).
79. Parkinson, H. *et al.* ArrayExpress update--an archive of microarray and high-throughput sequencing-based functional genomics experiments. *Nucleic Acids Res* **39**, D1002-4 (2011).
80. Fire, A. *et al.* Potent and specific genetic interference by double-stranded RNA in *Caenorhabditis elegans*. *Nature* **391**, 806-11 (1998).
81. Gunsalus, K.C., Yueh, W.C., MacMenamin, P. & Piano, F. RNAiDB and PhenoBlast: web tools for genome-wide phenotypic mapping projects. *Nucleic Acids Res* **32**, D406-10 (2004).
82. Gildorf, M. *et al.* GenomeRNAi: a database for cell-based RNAi phenotypes. 2009 update. *Nucleic Acids Res* **38**, D448-52 (2010).
83. Ren, Y. *et al.* siRecords: an extensive database of mammalian siRNAs with efficacy ratings. *Bioinformatics* **22**, 1027-8 (2006).
84. Heyn, H. & Esteller, M. DNA methylation profiling in the clinic: applications and challenges. *Nat Rev Genet* **13**, 679-92 (2012).
85. Turinsky, A.L. *et al.* DANCER: disease-annotated chromatin epigenetics resource. *Nucleic Acids Res* **39**, D889-94 (2011).
86. Lv, J. *et al.* DiseaseMeth: a human disease methylation database. *Nucleic Acids Res* **40**, D1030-5 (2012).
87. Ongenaert, M. *et al.* PubMeth: a cancer methylation database combining text-mining and expert annotation. *Nucleic Acids Res* **36**, D842-6 (2008).
88. Amoreira, C., Hindermann, W. & Grunau, C. An improved version of the DNA Methylation database (MethDB). *Nucleic Acids Res* **31**, 75-7 (2003).
89. Lauss, M. *et al.* MethCancerDB--aberrant DNA methylation in human cancer. *Br J Cancer* **98**, 816-7 (2008).
90. He, X. *et al.* MethyCancer: the database of human DNA methylation and cancer. *Nucleic Acids Res* **36**, D836-41 (2008).
91. LaFramboise, T. Single nucleotide polymorphism arrays: a decade of biological, computational and technological advances. *Nucleic Acids Res* **37**, 4181-93 (2009).
92. Cirulli, E.T. & Goldstein, D.B. Uncovering the roles of rare variants in common disease through whole-genome sequencing. *Nat Rev Genet* **11**, 415-25 (2010).
93. Sherry, S.T. *et al.* dbSNP: the NCBI database of genetic variation. *Nucleic Acids Res* **29**, 308-11 (2001).
94. Tahira, S. *et al.* dbQSNP: a database of SNPs in human promoter regions with allele frequency information determined by single-strand conformation polymorphism-based methods. *Hum Mutat* **26**, 69-77 (2005).
95. Thorisson, G.A. *et al.* HGVbaseG2P: a central genetic association database. *Nucleic Acids Res* **37**, D797-802 (2009).

96. Jackson, V. Studies on histone organization in the nucleosome using formaldehyde as a reversible cross-linking agent. *Cell* **15**, 945-54 (1978).
97. Berman, H.M. et al. The Protein Data Bank. *Acta Crystallogr D Biol Crystallogr* **58**, 899-907 (2002).
98. Gasteiger, E. et al. ExPASy: The proteomics server for in-depth protein knowledge and analysis. *Nucleic Acids Res* **31**, 3784-8 (2003).
99. Hunter, S. et al. InterPro in 2011: new developments in the family and domain prediction database. *Nucleic Acids Res* **40**, D306-12 (2012).
100. Hoogland, C., Mostaguir, K., Appel, R.D. & Lisacek, F. The World-2DPAGE Constellation to promote and publish gel-based proteomics data through the ExPASy server. *J Proteomics* **71**, 245-8 (2008).
101. Portales-Casamar, E. et al. JASPAR 2010: the greatly expanded open-access database of transcription factor binding profiles. *Nucleic Acids Res* **38**, D105-10 (2010).
102. Stark, C. et al. PhosphoGRID: a database of experimentally verified in vivo protein phosphorylation sites from the budding yeast *Saccharomyces cerevisiae*. *Database (Oxford)* **2010**, bap026 (2010).
103. Dinkel, H. et al. Phospho.ELM: a database of phosphorylation sites--update 2011. *Nucleic Acids Res* **39**, D261-7 (2011).
104. Gnad, F., Gunawardena, J. & Mann, M. PHOSIDA 2011: the posttranslational modification database. *Nucleic Acids Res* **39**, D253-60 (2011).
